# Supplementary material
Source: MDPI journal article supplement (https://www.mdpi.com/2311-7524/10/5/530)
Supplement: s1 [file s1]

Archive with 2 entries (2 files):
- Supplementary_Figure_S2.tif
- SUPPMAT_Medieval grapevines of southern Spain _25_04_24.pdf
