# Supplementary material
Source: MDPI journal article supplement (https://www.mdpi.com/2311-7524/10/5/530)
Supplement: s1 [file s1 › SUPPMAT_Medieval grapevines of southern Spain _25_04_24.pdf]

## Supplementary Materials

### Supplementary Table S1. Quantitative characters

| Quantitative characters |                                                 |
|-------------------------|-------------------------------------------------|
| 1.                      | Beak (Stalk) Ventral Length, mm (7)             |
| 2.                      | Beak (Stalk) at Junction Width, mm (5)          |
| 3.                      | Seed Length mm (1)                              |
| 4.                      | Seed Chalaza Shield Width, mm (10)              |
| 5.                      | Seed Chalaza Shield Length, mm (9)              |
| 6.                      | Seed Body Length, mm                            |
| 7.                      | Prism Volume Index, mm cube                     |
| 8.                      | Beak (Stalk) Basal End thickness, mm (8)        |
| 9.                      | Maximum Width, mm (2)                           |
| 10.                     | Maximum Thickness, mm (3)                       |
| 11.                     | Beak (Stalk) Dorsal Length, mm (6)              |
| 12.                     | Distance from Chalaza Apex to Seed Apex mm (11) |
| 13.                     | Beak (Stalk) Basal End Width mm (4)             |

**Note:** at the end are indicated the numbers in Supplementary figure 1. Only eleven, those numbered at the end here and in Supplementary table 1 were considered for the study of Medieval grapevine seeds.

### Supplementary Table S2. Qualitative characters

| Qualitative characters |                                     |
|------------------------|-------------------------------------|
| 1.                     | Radial Furrows, presence - absence. |
| 2.                     | Outline, five categories.           |
| 3.                     | Fossettes, four categories          |

**Note:** radial furrows were missing in all Medieval seeds.

### Supplementary Table S3. Allometric characters

| Allometric characters |                                                      |
|-----------------------|------------------------------------------------------|
| 1.                    | Width/Thickness Index                                |
| 2.                    | Width/Length Index (Stummer)                         |
| 3.                    | Union Beak Width/Union Beak Thickness Index          |
| 4.                    | Seed Width/Seed Chalaza Shield Width Index           |
| 5.                    | Seed Thickness/Beak Thickness at Union Index         |
| 6.                    | Seed Sphericity                                      |
| 7.                    | Seed Length/Seed Chalaza Shield Length Index         |
| 8.                    | Seed Chalaza Shield Width/Length Index               |
| 9.                    | Beak Width/Beak Length Index                         |
| 10.                   | Beak Length/Seed Length Index (Facsar-Perret)        |
| 11.                   | Distance Apex Index/Seed Chalaza Shield Length Index |
| 12.                   | Cumulative Length Index/Total Length                 |

**Supplementary Table S4.** Stummer's index for wild and domesticated grapevine seeds<sup>1</sup>.

| Range of values | Taxa                    |
|-----------------|-------------------------|
| 44-53           | <i>V. vinifera</i>      |
| 54-75           | Intermediate or hybrids |
| 76-83           | <i>V. sylvestris</i>    |

<sup>1</sup> Formula: B/L x 100.

**Supplementary Table S5.** Facsar - Perret's index for wild and domesticated grapevine seeds<sup>1</sup>.

| Range of values | Taxa                 |
|-----------------|----------------------|
| 12-18           | <i>V. sylvestris</i> |
| 19-30           | <i>V. vinifera</i>   |

<sup>1</sup> Formula: LS/L x 100. LS: stalk lengt, L: seed length.

**Supplementary Table S6.** Mangafa and Kotsakis's indexes for wild and domesticated grapevine seeds<sup>1</sup>.

| Range of values             | Taxonomic information                                    |
|-----------------------------|----------------------------------------------------------|
| Range of values (Formula 1) | Seed classification                                      |
| < -0.2                      | Wild grapes                                              |
| -0.2 < x < 0.2              | Wild grapes (64.7% probability to be wild)               |
| 0.2 < x < 0.8               | Domesticated grapes (76.2% probability to be cultivated) |
| > 0.8                       | Domesticated grapes                                      |
| Range of values (Formula 2) | Seed classification                                      |
| < -0.2                      | Wild grapes                                              |
| -0.2 < x < 0.4              | Wild grapes (64.7% probability to be wild)               |
| 0.4 < x < 0.9               | Domesticated grapes (76.2% probability to be cultivated) |
| > 0.9                       | Domesticated grapes                                      |
| Range of values (Formula 3) | Seed classification                                      |
| < 0                         | Wild grapes                                              |
| 0 < x < 0.5                 | Wild grapes (90.1% probability to be wild)               |
| 0.5 < x < 0.9               | Domesticated grapes (63.3% probability to be cultivated) |
| > 0.9                       | Domesticated grapes                                      |
| Range of values (Formula 4) | Seed classification                                      |
| < -0.9                      | Wild grapes                                              |
| -0.9 < x < 0.2              | Wild grapes (90.1% probability to be wild)               |
| 0.2 < x < 1.4               | Domesticated grapes (63.3% probability to be cultivated) |
| > 1.4                       | Domesticated grapes                                      |

<sup>1</sup> Formula 1:  $-0.3801 + (-30.2 \text{ LS/L}) + 0.4564 \text{ PCH} - 1.386 \text{ L} + 2.88 \text{ PCH/L} + 9.4239 \text{ LS}$ ; Formula 2:

$0.2951 + (-12.64 \text{ PCH/L} - 1.6416 \text{ L} + 4.5131 \text{ PCH} + 9.63 \text{ LS/L})$ ; Formula 3:  $-7.491 + (1.7715 \text{ PCH} + 0.49$

$\text{PCH/L} + 9.56 \text{ LS/L})$ ; Formula 4:  $0.7509 + (-1.5748 \text{ L} + 5.297 \text{ PCH} - 14.47 \text{ PCH/L})$ . LS, stalk length; L,

seed length; PCH, chalaza position.

## Seed dimensions

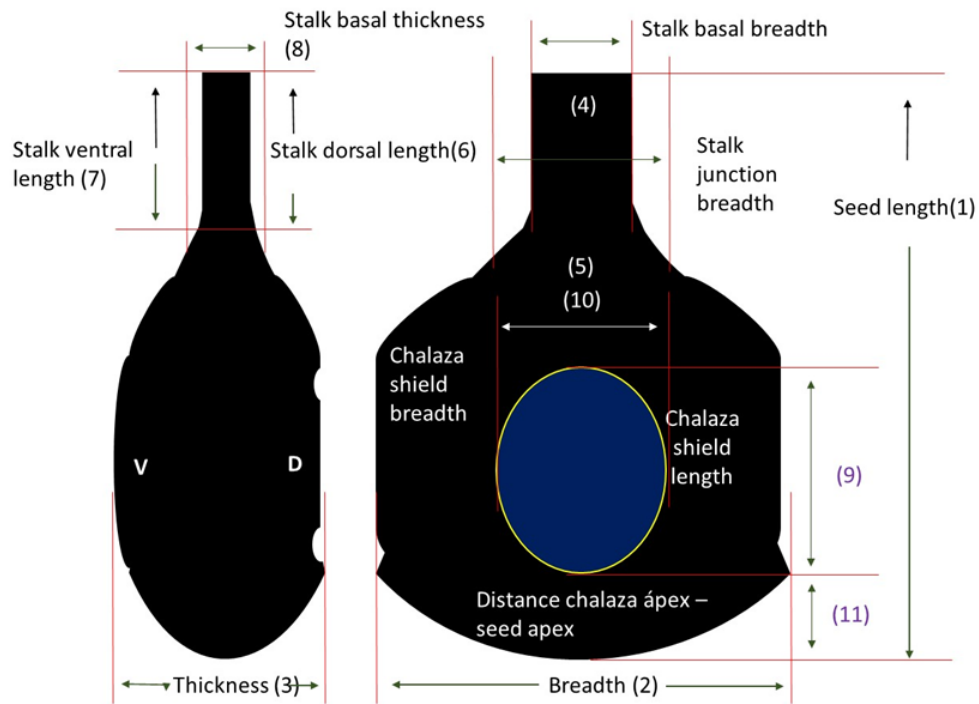

## Outline

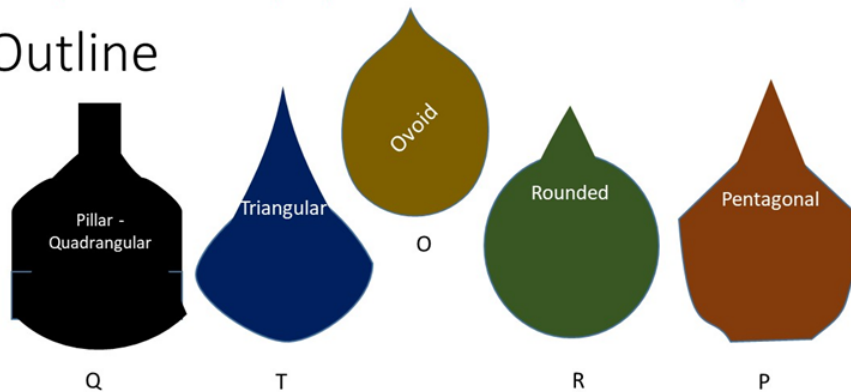

## Fossettes

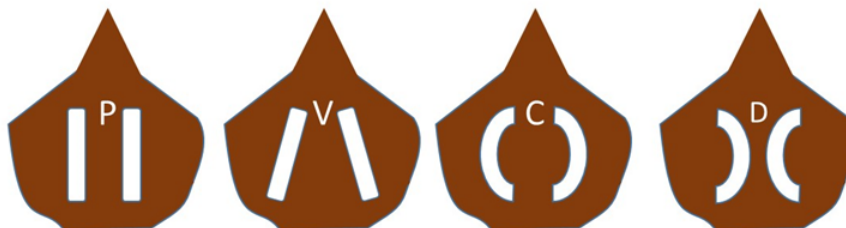

**Supplementary Figure S1.** Qualitative and quantitative characters analysed in grapevine seeds.
