# Supplementary material
Source: MDPI journal article supplement (https://www.mdpi.com/2311-7524/10/5/530)

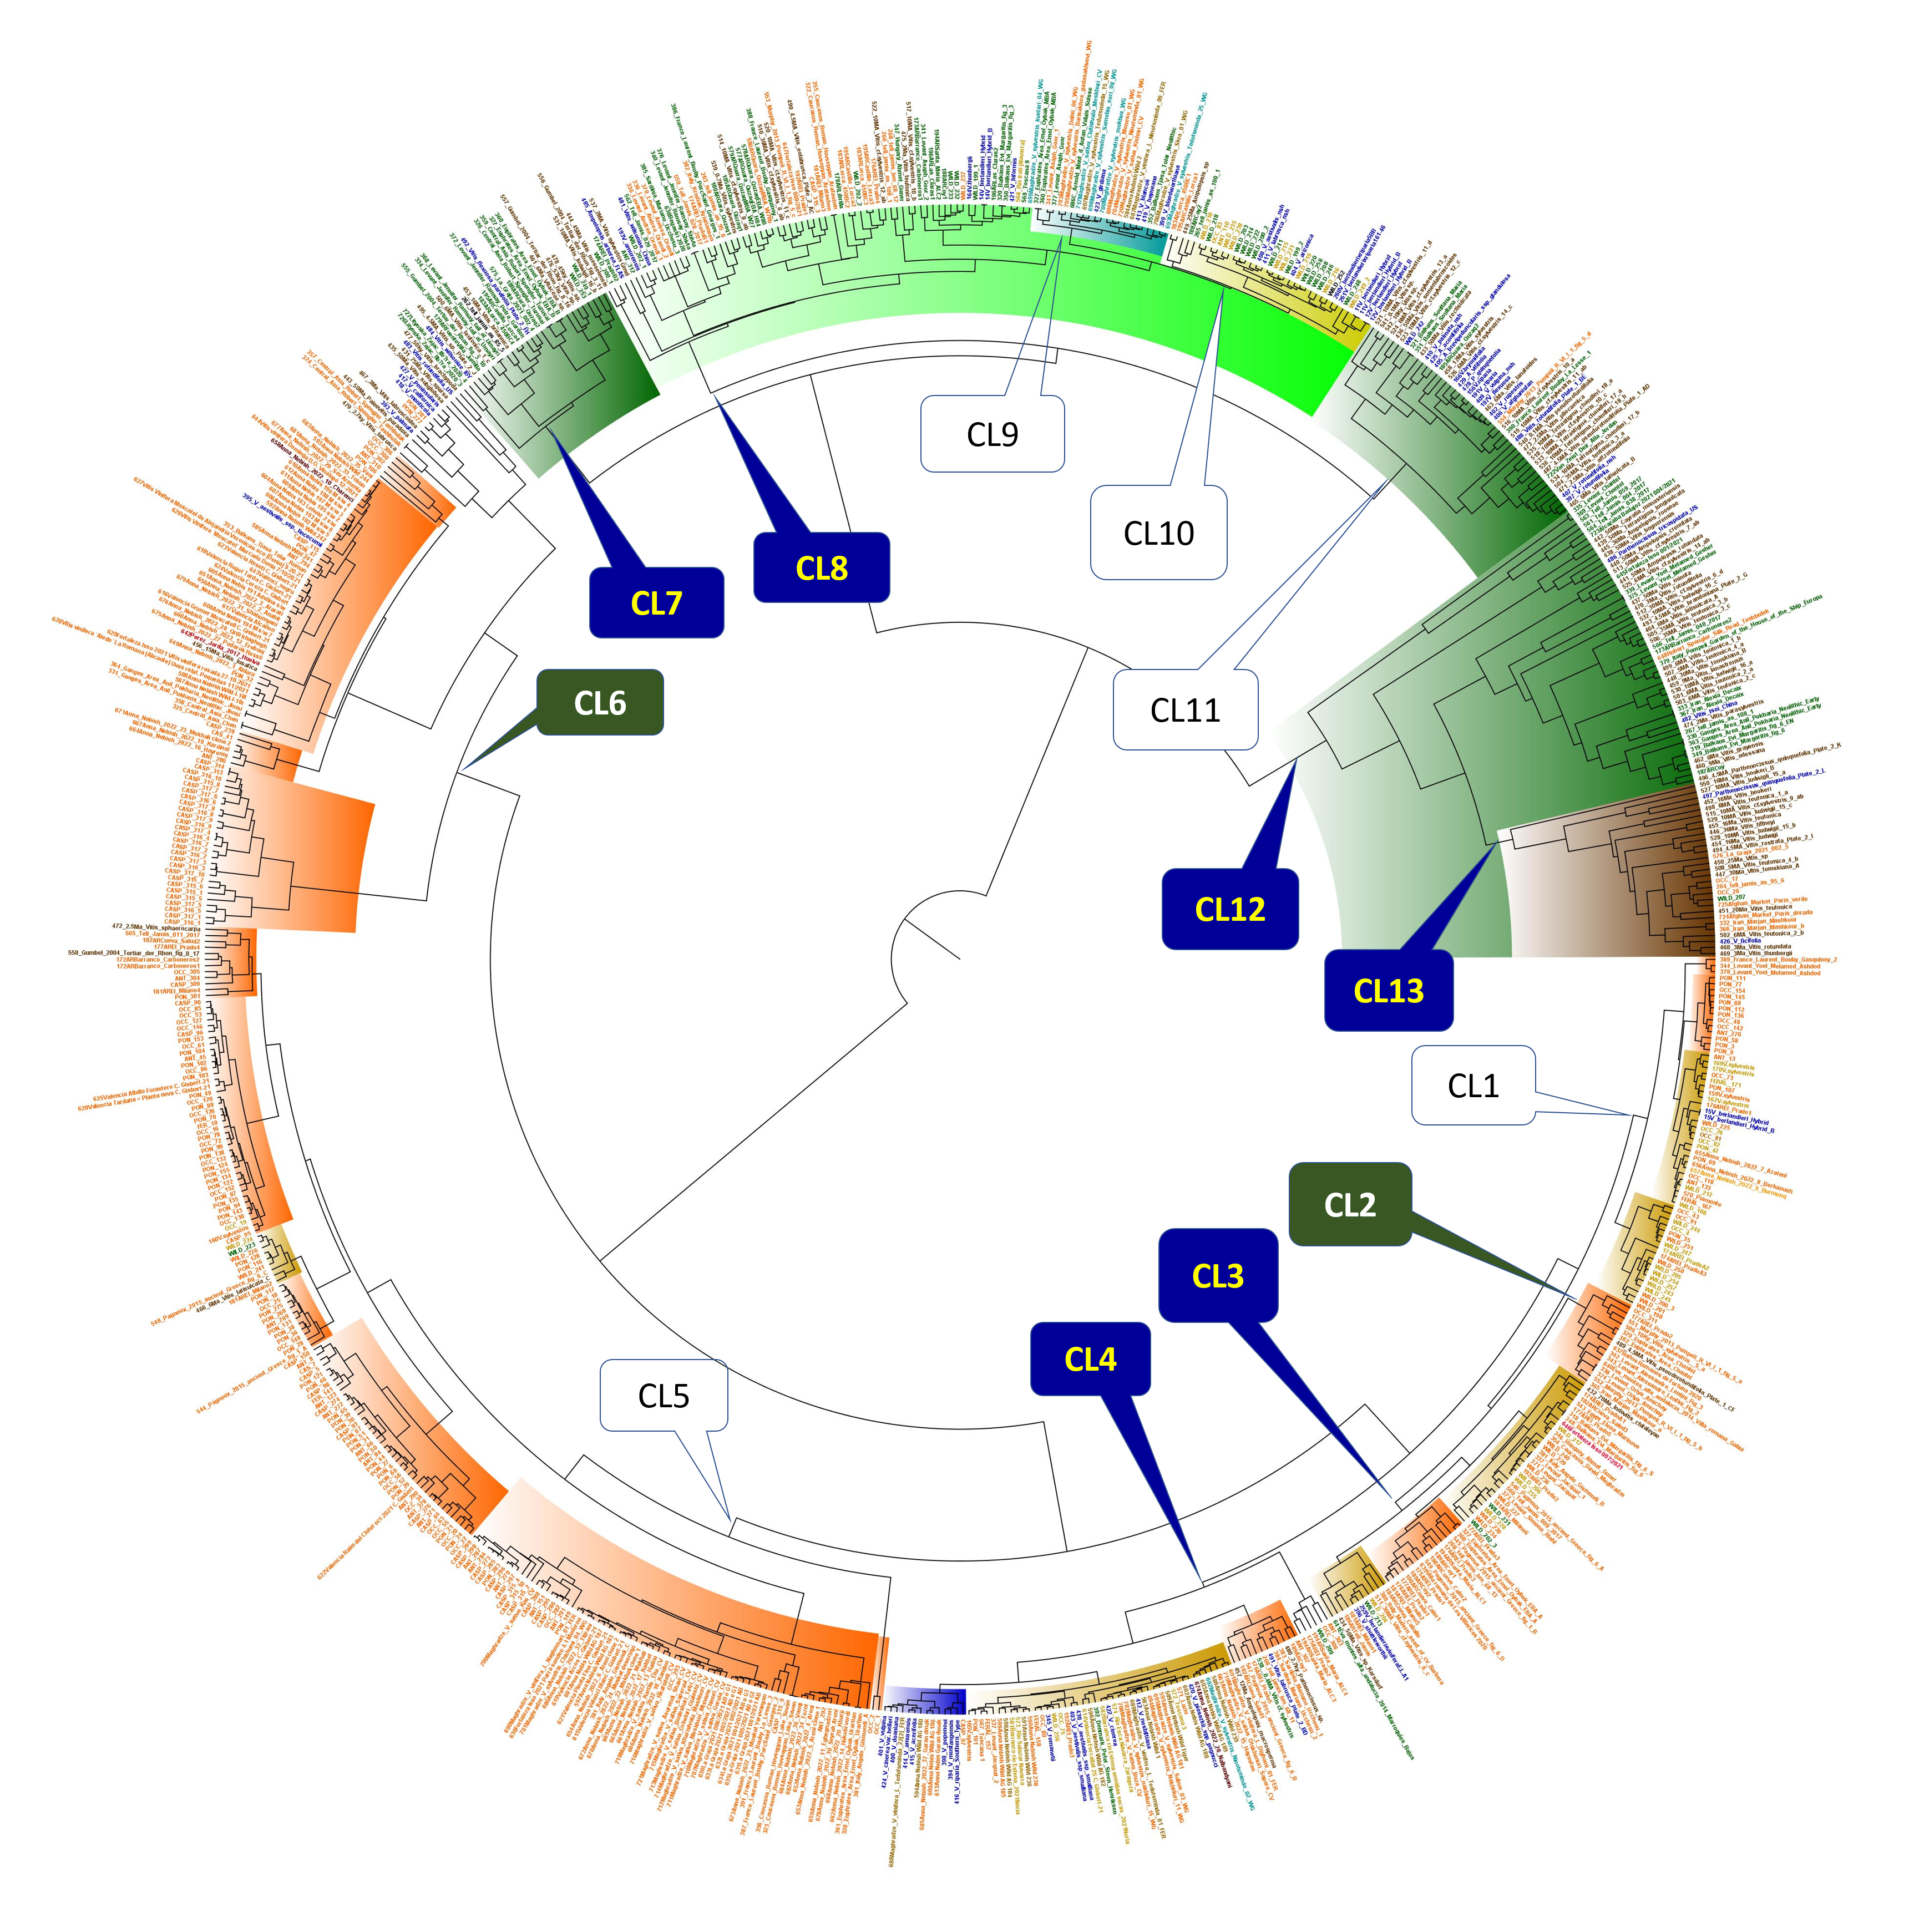

Supplement: s1 [file s1 › Supplementary_Figure_S2.tif]
